# Supplementary material for: Objective quantification of surface roughness parameters affecting superhydrophobicity
Source: Royal Society of Chemistry journal article supplement (doi:10.1039/d0ra03137b), 2020-01-01
Supplement: d0ra03137b1.pdf [file d0ra03137b1.pdf]

## Supporting information

### Objective Quantification of Surface Roughness Parameters Affecting Superhydrophobicity

Yoonkyung Cho<sup>a</sup> and Chung Hee Park<sup>\*a</sup>

<sup>a</sup> *Department of Textiles, Merchandising and Fashion Design, Seoul National University,  
Seoul, 08826, Republic of Korea*

<sup>\*</sup> *Corresponding Authors: Prof. Chung Hee Park (junghee@snu.ac.kr)*

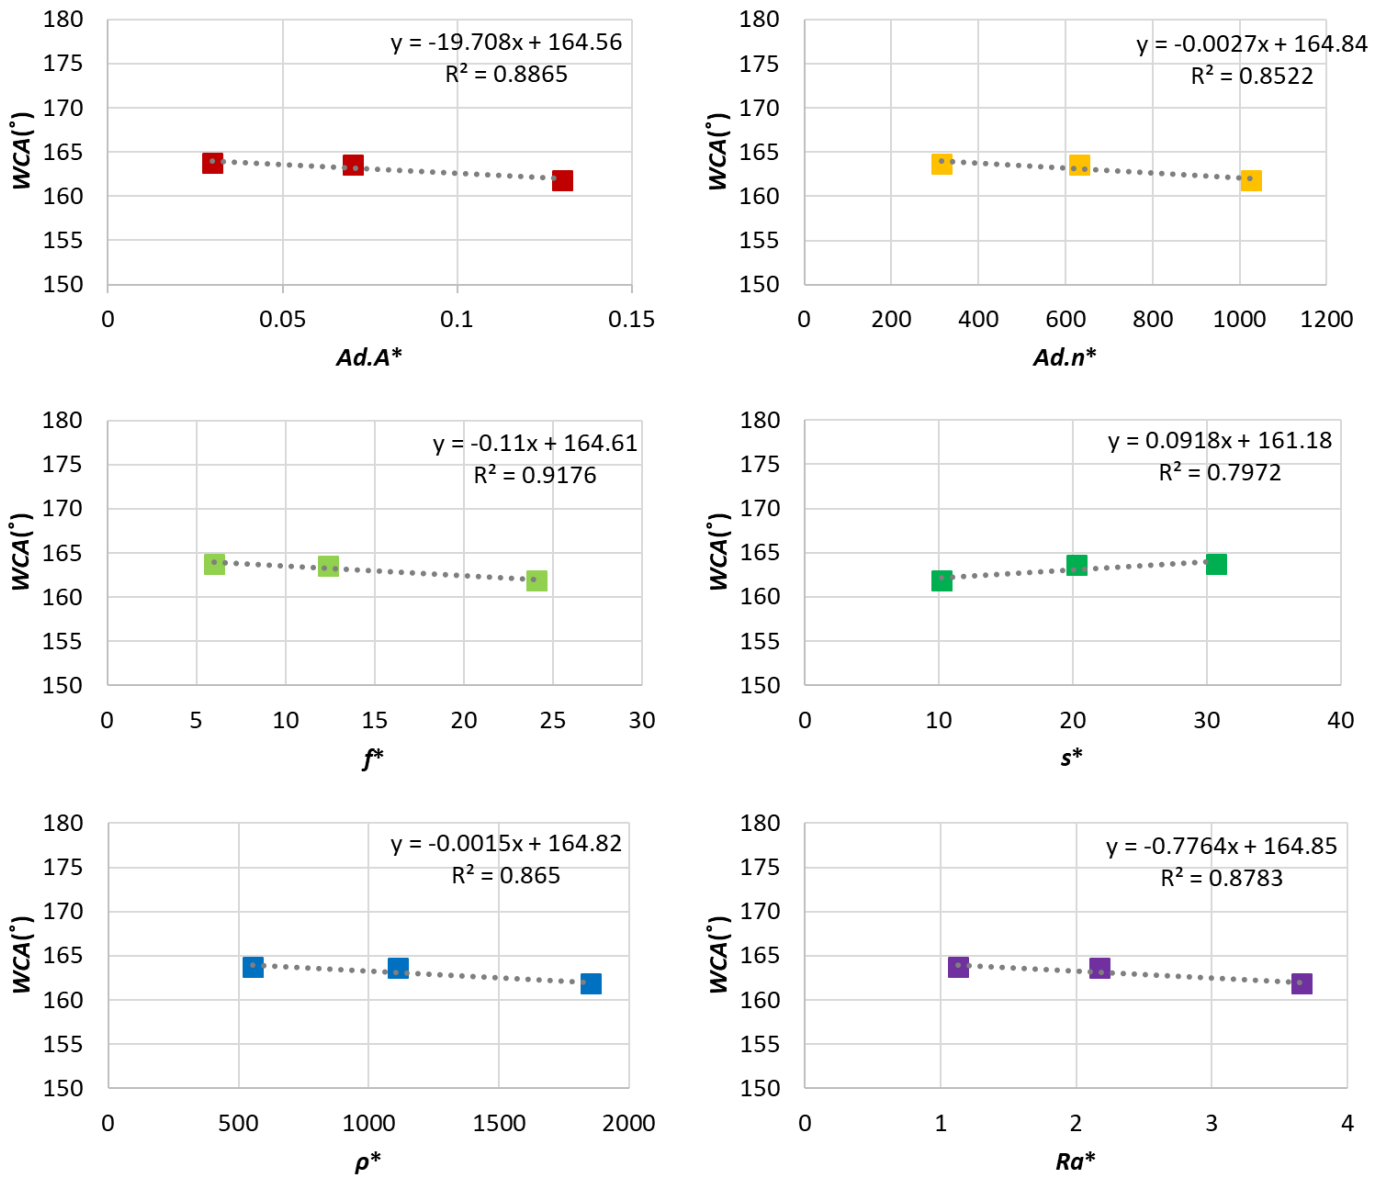

Fig. S1 (a) Plots of linear regression results of optical roughness parameters and water contact angle of H10 samples with 3.5- $\mu$ l water droplet

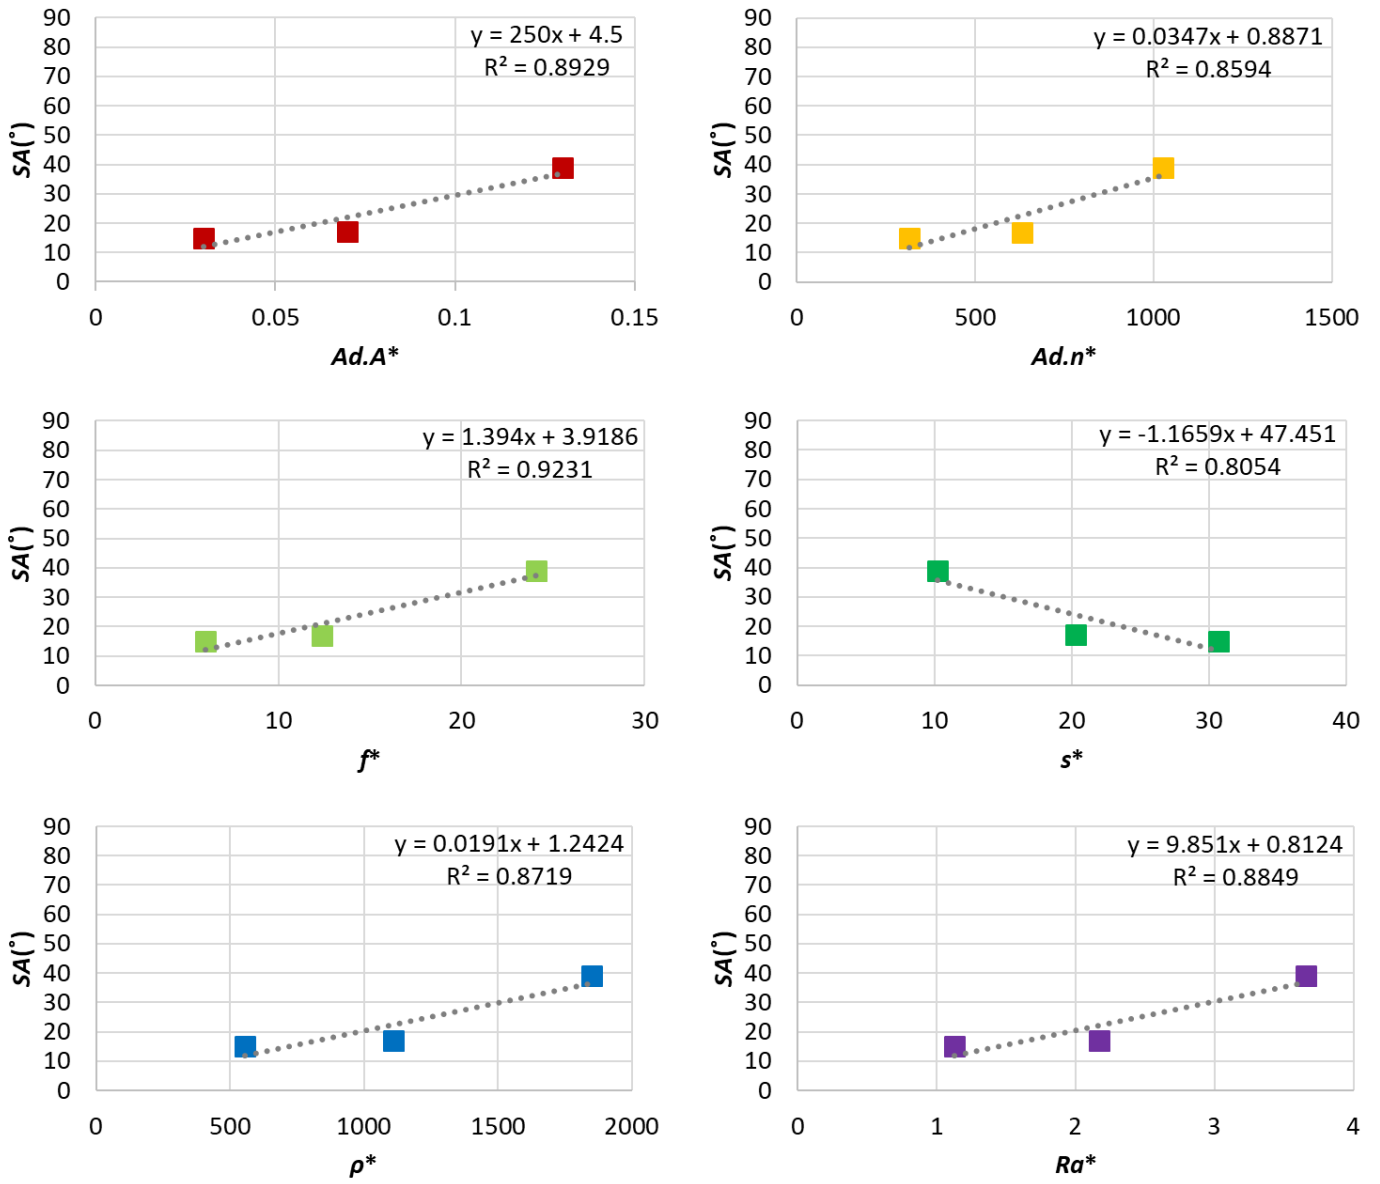

Fig. S1 (b) Plots of linear regression results of optical roughness parameters and sliding angle of H10 samples with 3.5- $\mu$ l water droplet

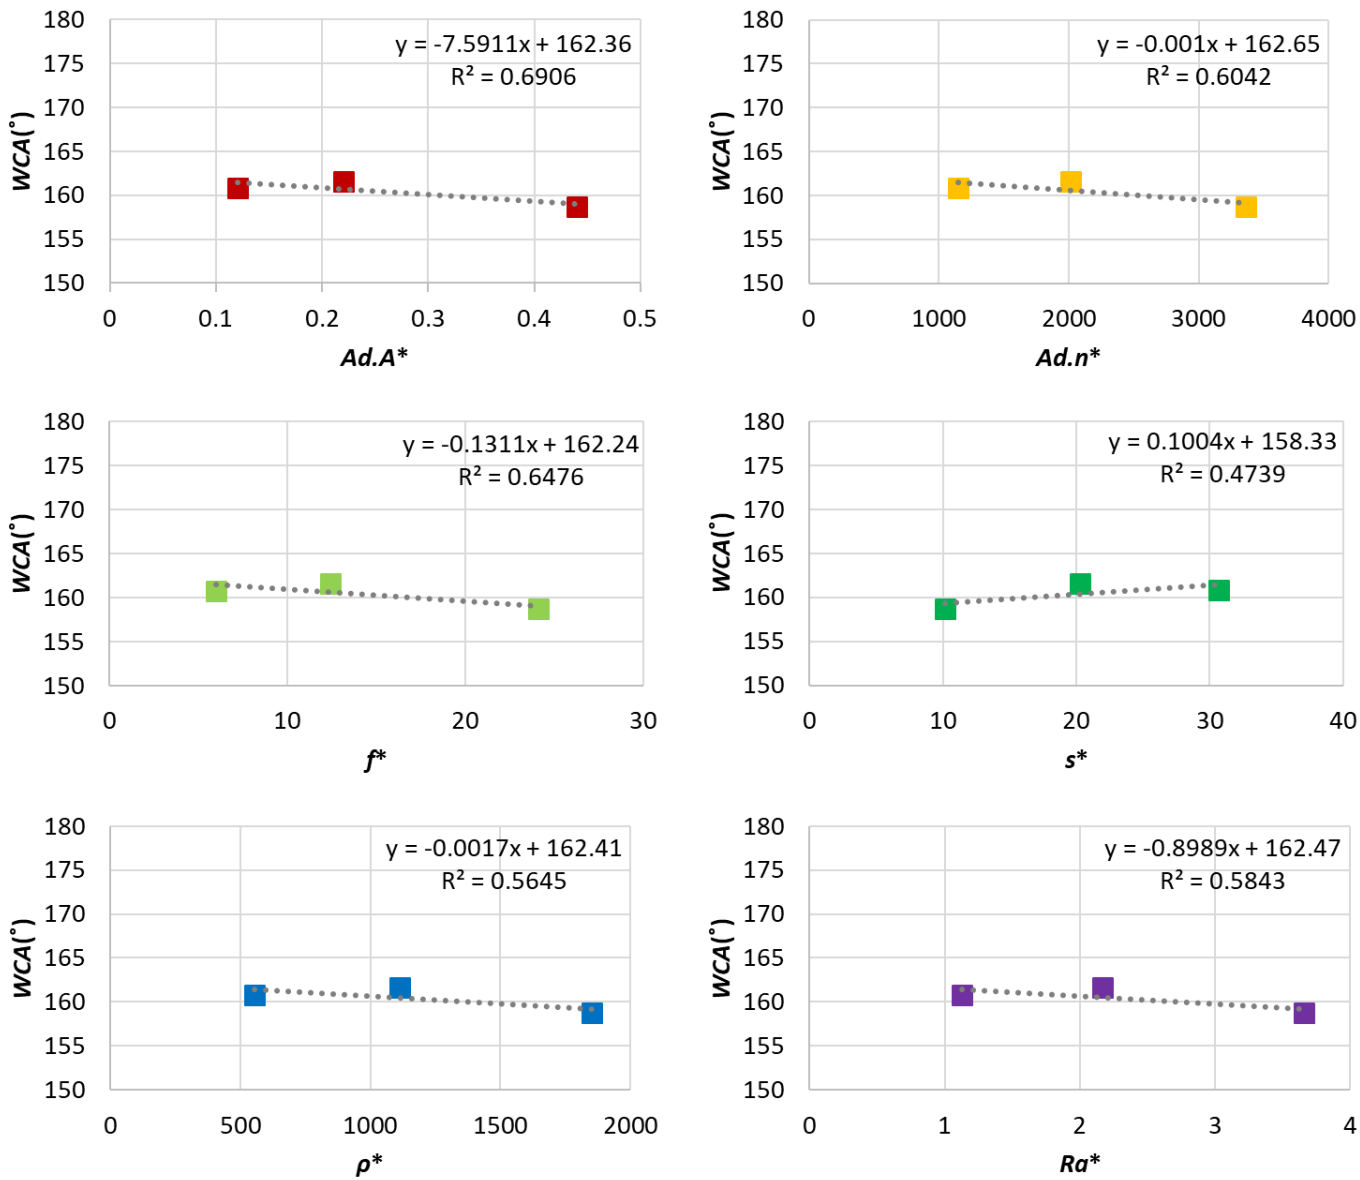

Fig. S1 (c) Plots of linear regression results of optical roughness parameters and water contact angle of H10 samples with 12- $\mu$ l water droplet

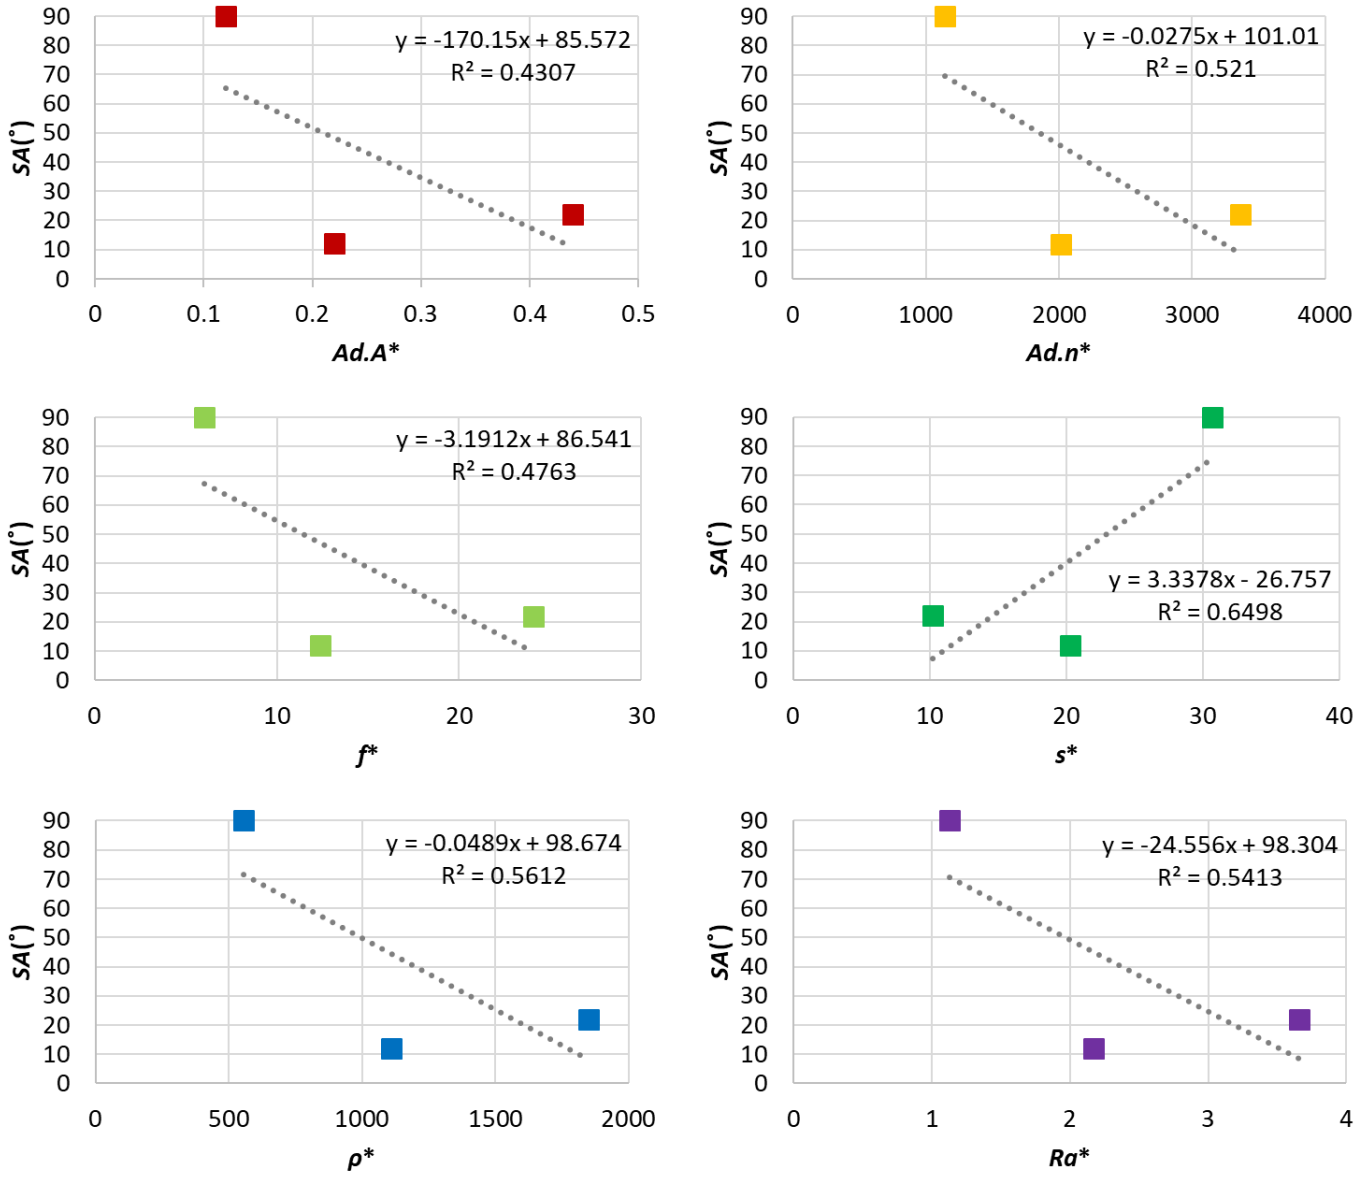

Fig. S1 (d) Plots of linear regression results of optical roughness parameters and sliding angle of H10 samples with 12- $\mu$ l water droplet

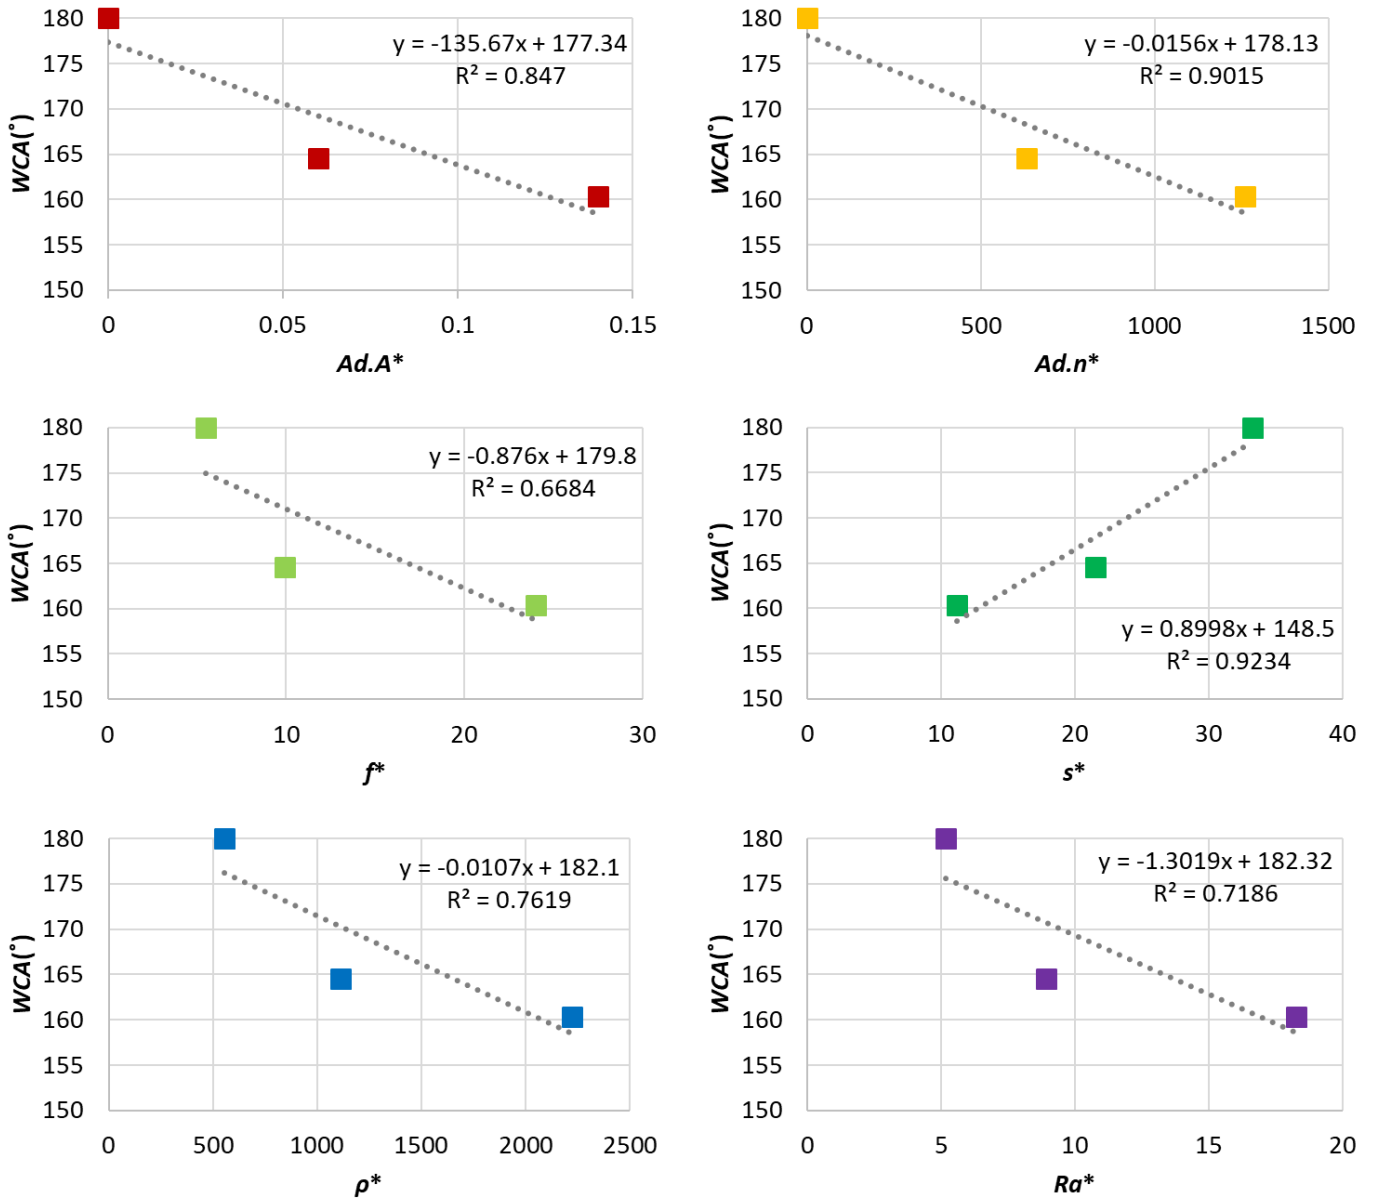

Fig. S1 (e) Plots of linear regression results of optical roughness parameters and water contact angle of H50 samples with 3.5- $\mu$ l water droplet

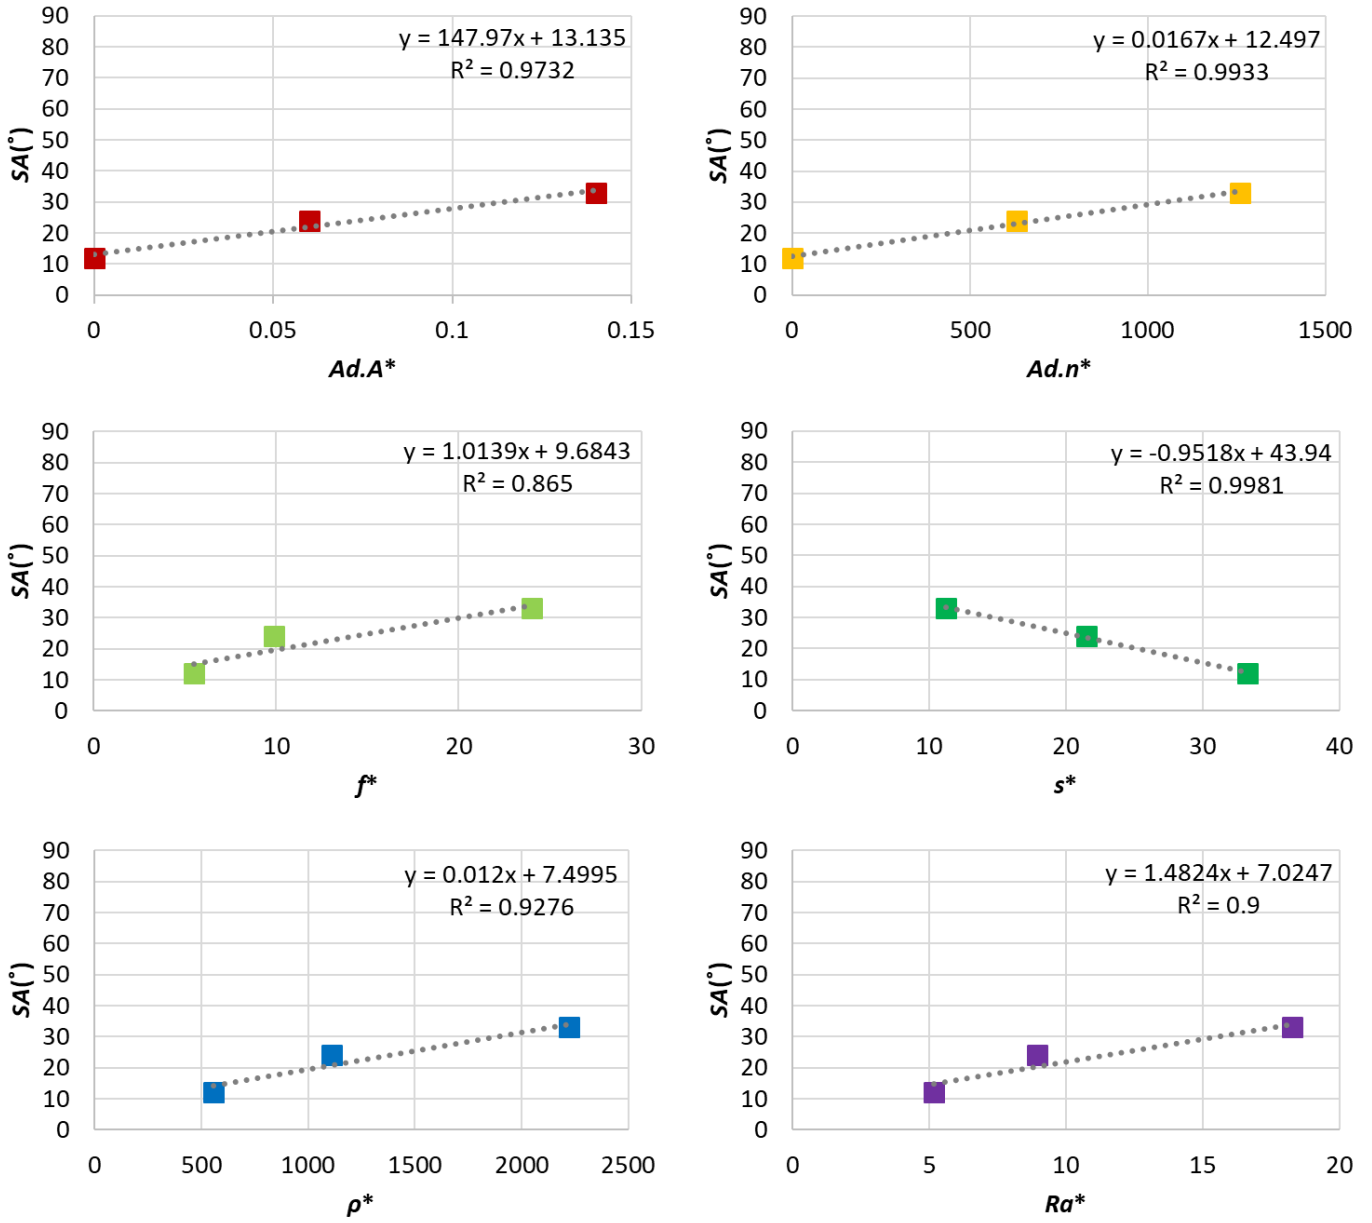

Fig. S1 (f) Plots of linear regression results of optical roughness parameters and sliding angle of H50 samples with 3.5- $\mu$ m water droplet

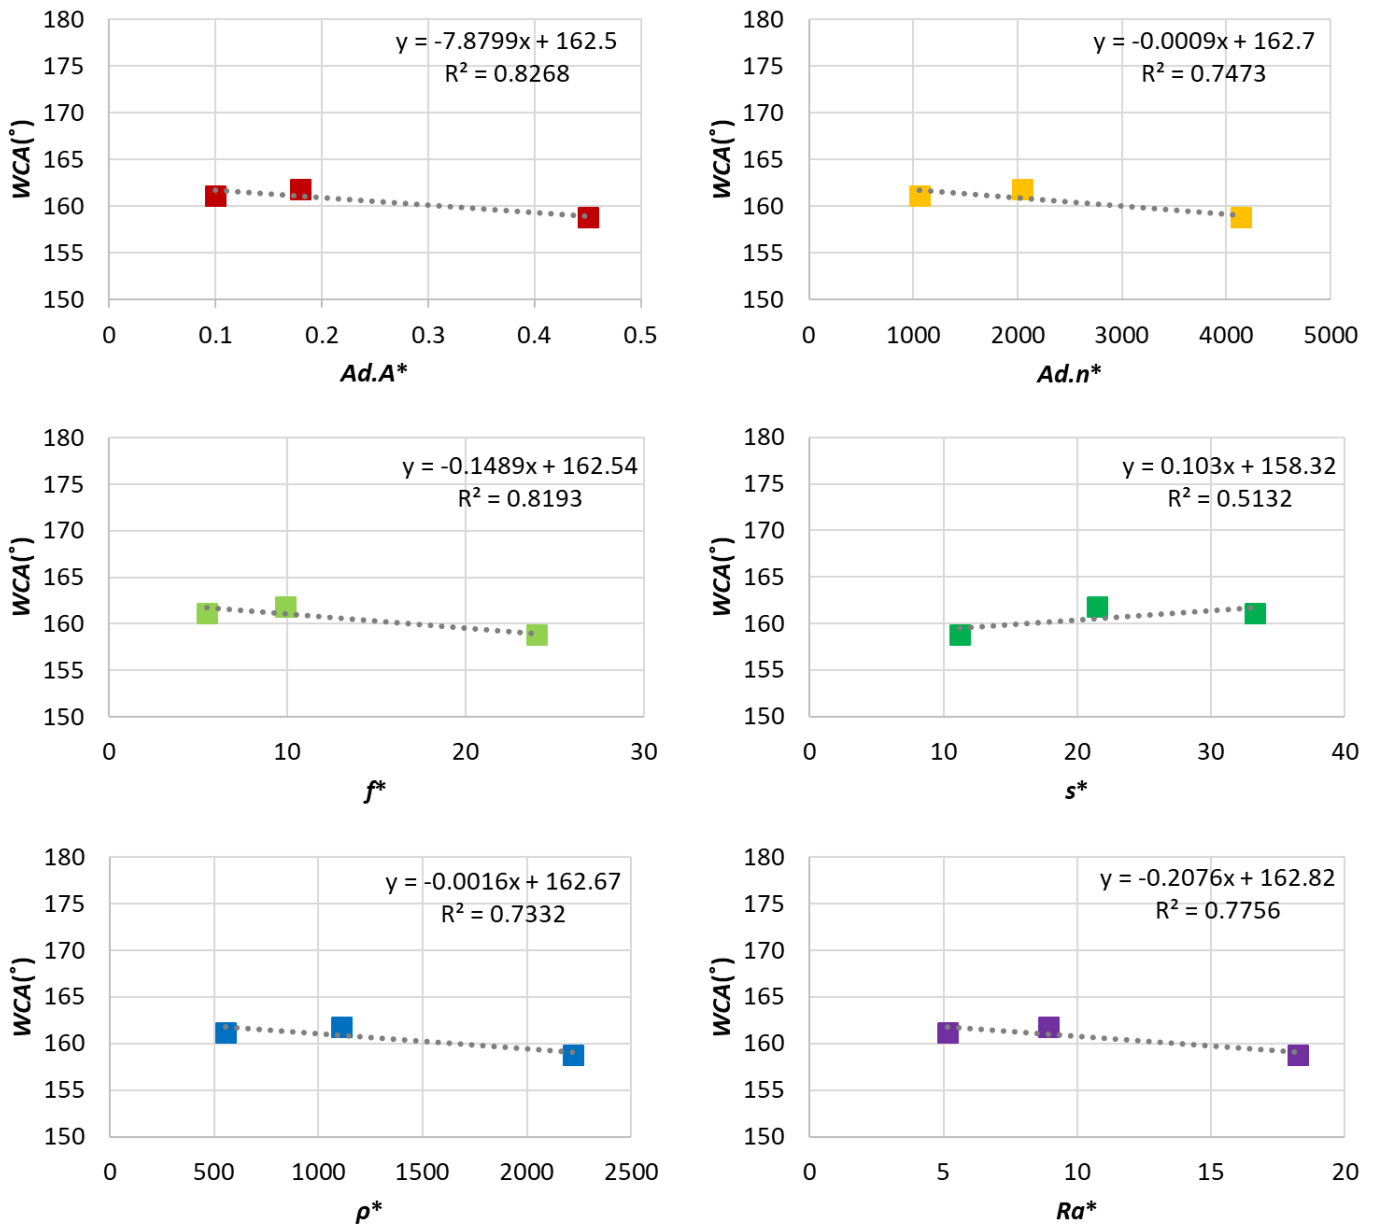

Fig. S1 (g) Plots of linear regression results of optical roughness parameters and water contact angle of H50 samples with 12- $\mu$ l water droplet



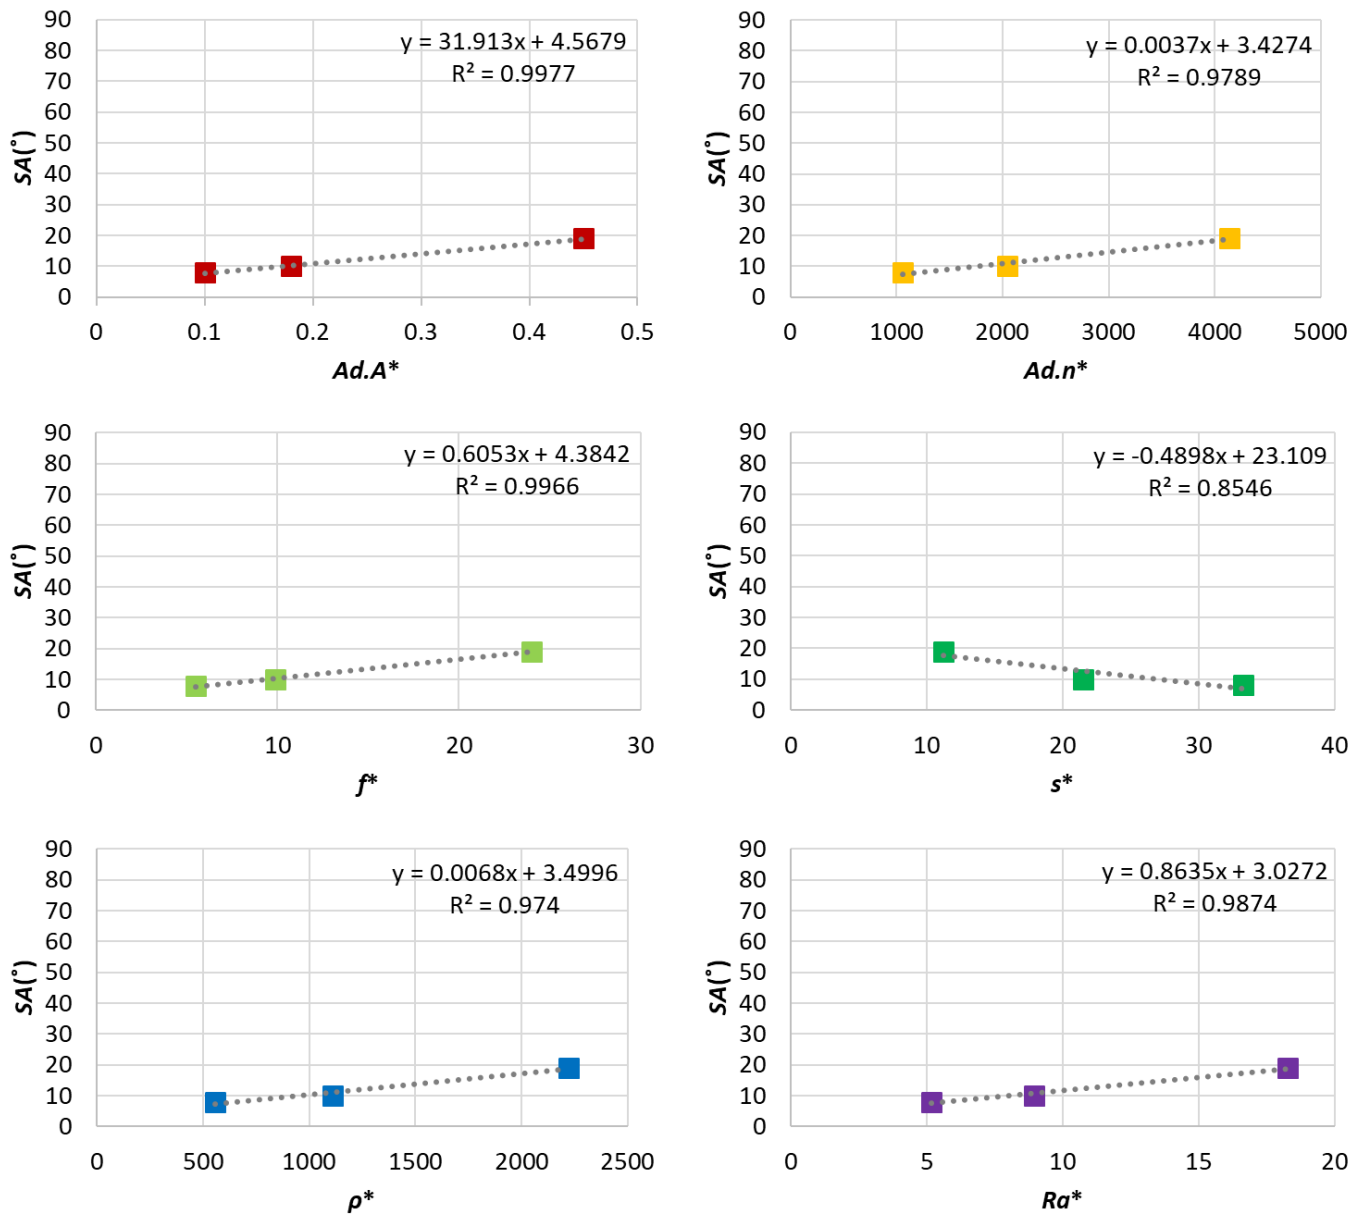

Fig. S1 (g) Plots of linear regression results of optical roughness parameters and sliding angle of H50 samples with 12-μl water droplet
